# Supplementary material
Source: PubMed Central journal article supplement (PMC3710363)

## **Supplemental Material to:**

**Ehsan Ranaei-Siadat, Céline Fabret, Bili Seijo,  
Frédéric Dardel, Henri Grosjean and Sylvie Nonin-Lecomte**

**RNA-methyltransferase TrmA is a dual-specific  
enzyme responsible for C5-methylation of  
uridine in both tmRNA and tRNA**

**2013; 10(4)**

**<http://dx.doi.org/10.4161/rna.24327>**

**[www.landesbioscience.com/journals/rnabiology/article/24327/](http://www.landesbioscience.com/journals/rnabiology/article/24327/)**

FIGURE S1

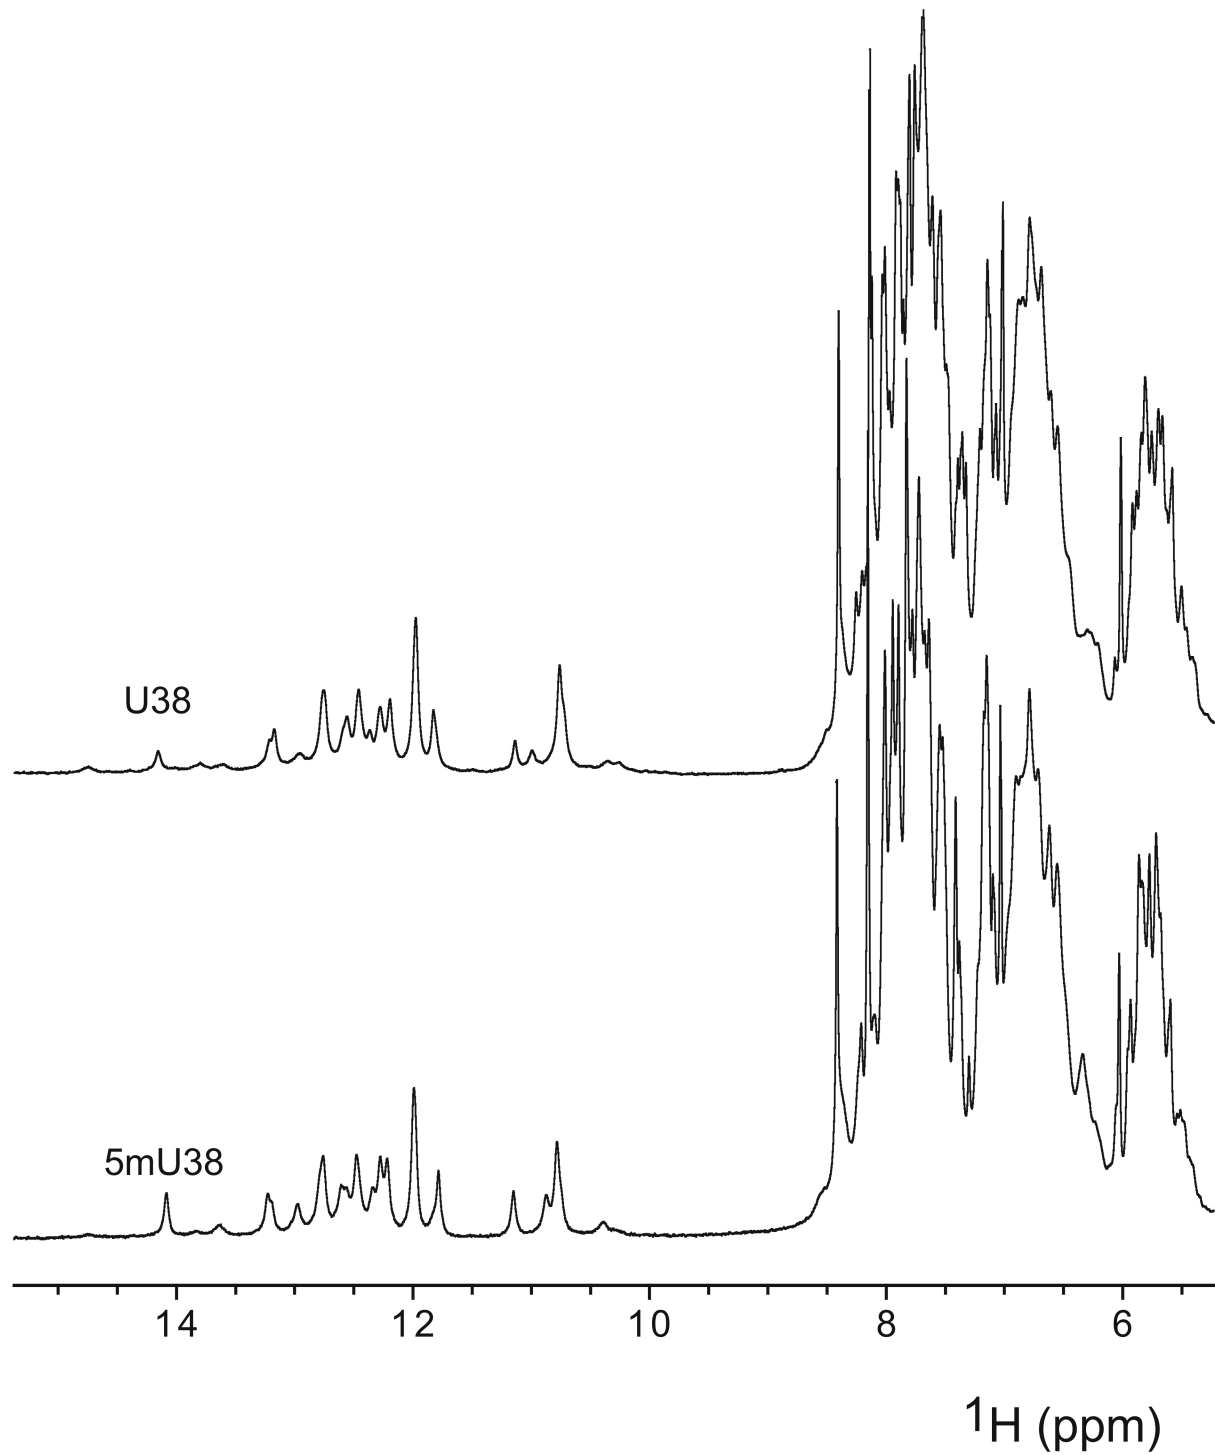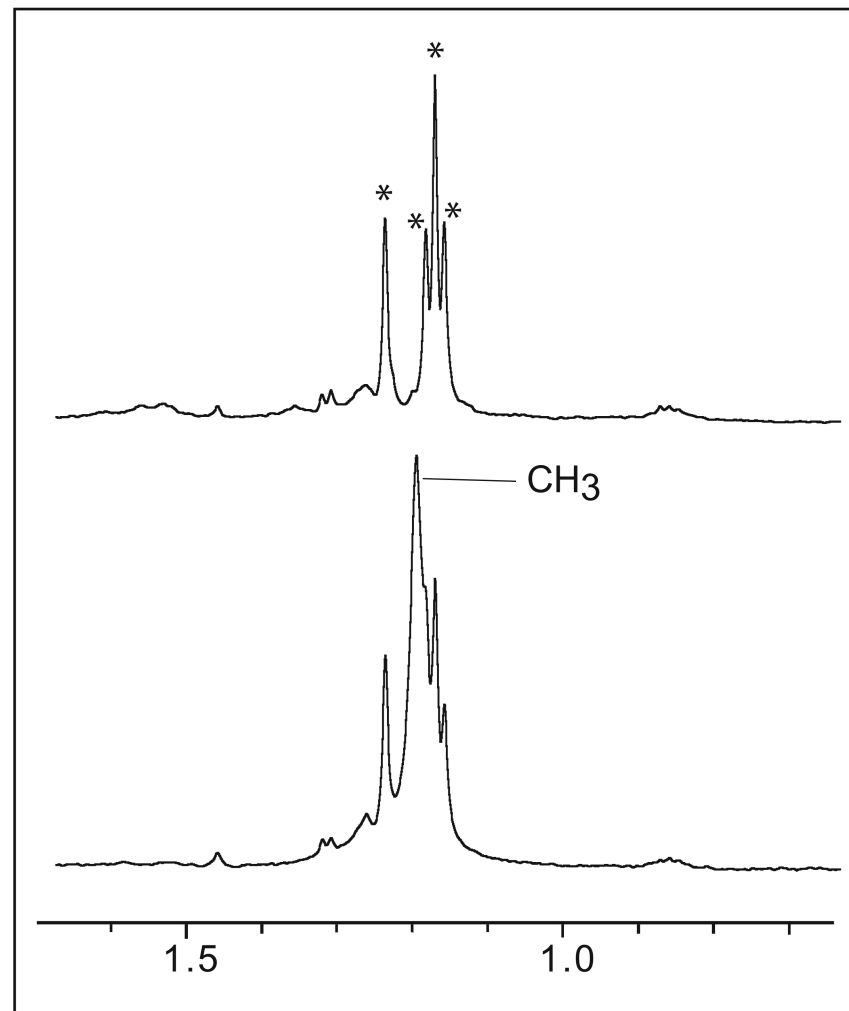

FIGURE S2

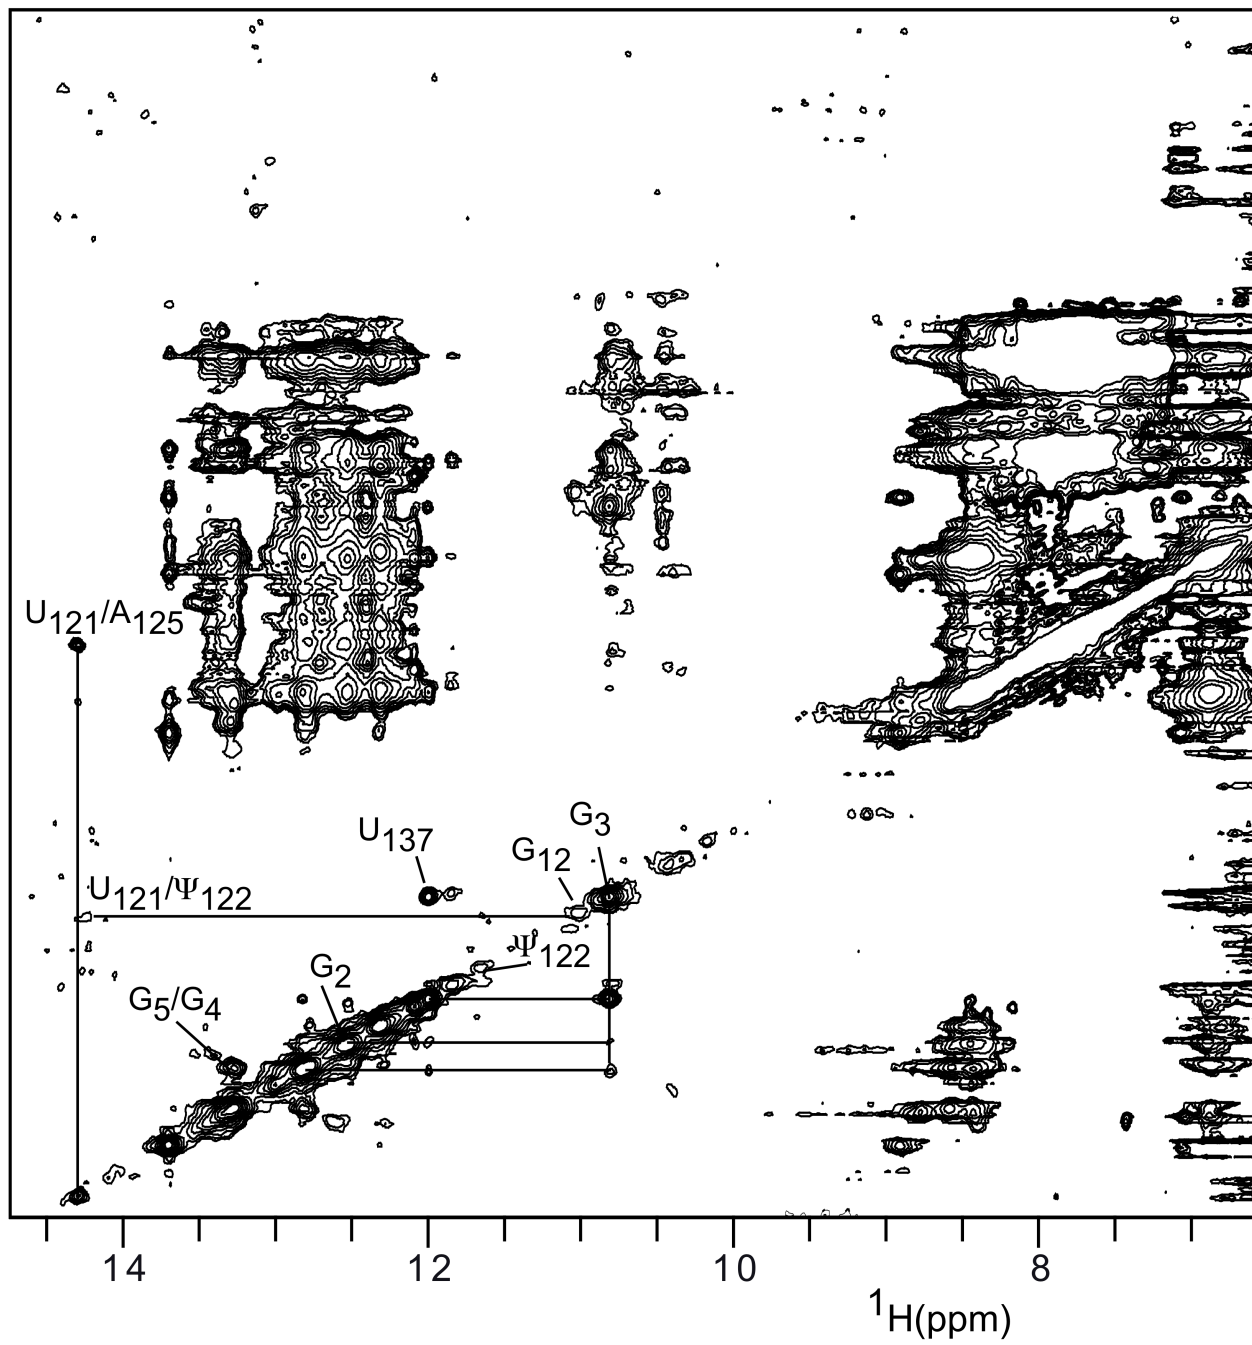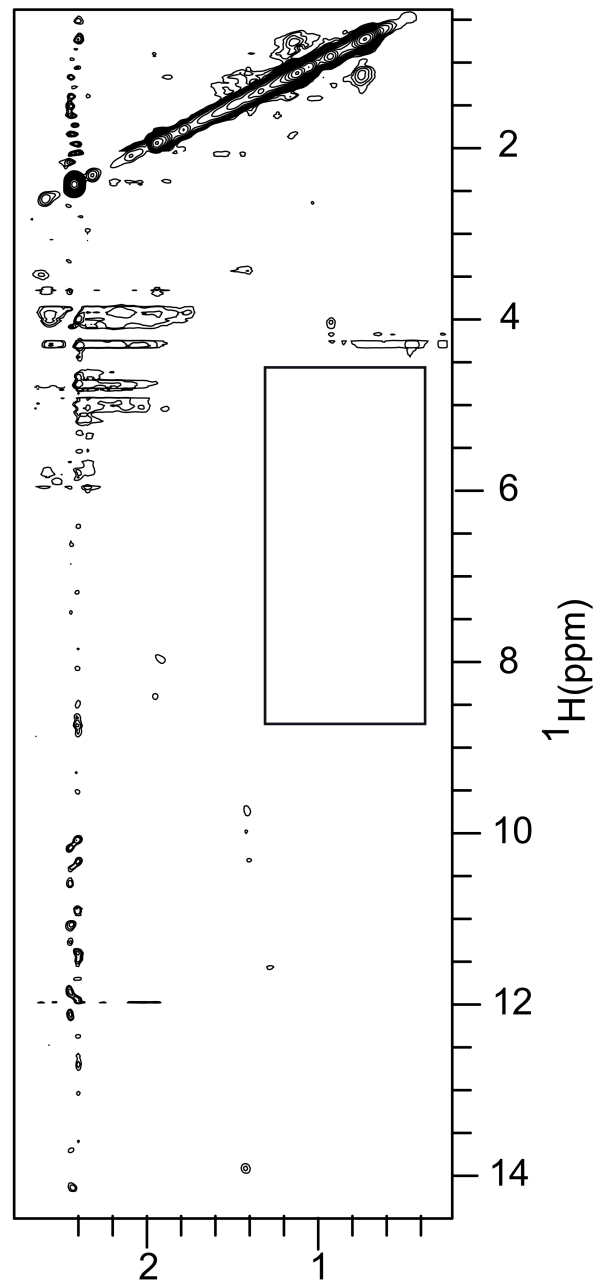

Supplement: rna-10-572-s01.pdf [file rna-10-572-s01.pdf]
